# Supplementary material
Source: publisher figshare collection journal article supplement (https://future-science-group.figshare.com/articles/dataset/_/21081724)
Supplement: Supplementary file 1 [file 1]

Figure S1. Magnetic hysteresis curves Fe3O4@PDA-HCPT NPs at 300K.

Figure S2. Biocompatibility of different concentrations (0,12.5,25,50,100,150 and 200μg/mL) of Fe3O4@PDA on EC1 and EC109 cells.

Figure S3. Intracellular GSH level of EC1 and EC109 cells after treated with different formulations.

Figure S4. Tumor inhibition rate（n=5）

Figure S5. HE staining of different organs (Heart, Liver, Spleen, Lung and Kidney) obtained from BALB/C mice after different treatments (scale bar: 100 μm)
